# Supplementary material for: An artificial enzymatic reaction cascade for a cell-free bio-system based on glycerol
Source: Royal Society of Chemistry journal article supplement (doi:10.1039/c4gc01685h), 2014-11-04
Supplement: c4gc01685h1.pdf [file c4gc01685h1.pdf]

## Electronic Supplementary Information

### **An Artificial Enzymatic Reaction Cascade for a Cell-free Bio-system Based on Glycerol**

*Chao Gao,<sup>a</sup> Zhong Li,<sup>a</sup> Lijie Zhang,<sup>a</sup> Chao Wang,<sup>a</sup> Kun Li,<sup>a</sup> Cuiqing Ma,<sup>\*a</sup> and*

*Ping Xu<sup>\*b</sup>*

<sup>a</sup> State Key Laboratory of Microbial Technology, Shandong University, Jinan 250100,  
People's Republic of China. E-mail: macq@sdu.edu.cn

<sup>b</sup> State Key Laboratory of Microbial Metabolism, and School of Life Sciences &  
Biotechnology, Shanghai Jiao Tong University, Shanghai 200240, People's Republic  
of China. E-mail: pingxu@sjtu.edu.cn

## Materials and Methods

### Chemicals and materials.

Isopropyl- $\beta$ -D-1-thiogalactopyranoside (IPTG), phenylmethanesulfonyl fluoride (PMSF), and dithiothreitol (DTT) were all purchased from Sigma-Aldrich (St. Louis, MO, USA). PCR primers were obtained from Sangon (Shanghai, China). Ampicillin was purchased from Amresco (USA). Restriction enzymes were obtained from Fermentas (Lithuania). T<sub>4</sub> DNA ligase and fastPfu DNA polymerase were purchased from MBI (USA) and Transgen Biotech (China), respectively. The catalase in *Aspergillus niger* was purchased from Sigma-Aldrich (C3515). All other chemicals were of analytical grade and commercially available.

### Strains, primers, plasmids and medium.

Bacterial strains, primers and plasmids used in this study are listed in Table S1.

*Escherichia coli* BL21 (DE3) was used for protein expression, and *E. coli* DH5 $\alpha$  was used for general cloning. Luria-Bertani (LB) medium was used for *E. coli* and *Bacillus licheniformis* 10-1-A culture and recombinant protein expression. Ampicillin was used at a concentration of 100  $\mu\text{g mL}^{-1}$ .

### Vector construction.

Full-length genes of *Aldo* in *Streptomyces coelicolor* A3 (with optimized *E. coli* codon usage) and *Dhad* in *Sulfolobus solfataricus* were synthesized by Sangon (Shanghai, China) and delivered in the company's standard plasmids. The genes *Aldo* and *Dhad*

were amplified using the Sangon vectors as templates and the corresponding oligonucleotides (Table S2). Genomic DNA of *B. licheniformis* 10-1-A was extracted through the Wizard Genomic DNA Purification Kit (Promega, Madison, WI, USA). The genes *Als* and *Aldc* were amplified from genomic DNA of *B. licheniformis* 10-1-A using the corresponding oligonucleotides (Table S2). The PCR products were ligated to the pEasy-Blunt vector, and the resulting plasmids were then digested with restriction enzymes indicated in Table S2. The gel purified fragments were then ligated to the pETDuet-1 vector that had been digested with the same restriction enzymes to construct the plasmids for the expression of Aldo, DHAD, ALS and ALDC.

### **Recombinant proteins expression and purification.**

The protein expression plasmids were introduced separately in *E. coli* BL21 (DE3). *E. coli* BL21(DE3) carrying plasmid pETDuet-*Aldo*, pETDuet-*Dhad*, pETDuet-*Als* or pETDuet-*Aldc* were grown at 30°C in LB medium with 100 µg mL<sup>-1</sup> ampicillin to an optical density of 0.5 at 620 nm. Then, 1 mM IPTG was added to induce the expression of Aldo, DHAD, ALS and ALDC. After cultivation for another 12 h at 16°C, cells were harvested and washed with 0.85% (wt/vol) sodium chloride solution by centrifugation at 8,000 rpm for 5 min. The cell pellet was subsequently suspended in the binding buffer (pH 7.4; 20 mM sodium phosphate, 20 mM imidazole, and 500 mM sodium chloride) containing 0.5 mM PMSF, 1 mM DTT and 10% glycerol. Cells were disrupted by sonication (Sonics500 W; 20 KHz) for 10 min in an ice bath, and

the cell lysate was centrifuged at 8,000 rpm for 30 min at 4°C. The supernatant was loaded onto a HisTrap HP column (5 mL) and eluted with 40% binding buffer and 60% elution buffer (pH 7.4; 20 mM sodium phosphate, 500 mM imidazole, and 500 mM sodium chloride) at a flow rate of 5 mL min<sup>-1</sup>. The fractions containing Aldo, DHAD, ALS and ALDC were concentrated by ultrafiltration, desalted with gel G-25 and detected by sodium dodecyl sulfate-polyacrylamide gel electrophoresis (SDS-PAGE).

#### **Enzyme activity assays.**

**Aldo activity:** The Aldo activity was assayed in a reaction mixture containing 100 mM HEPES buffer (pH 7.4), and 50 mM glycerol. After the conversion at 50°C for 3 h, the oxidization of glycerol to glycerate was determined via high-performance liquid chromatography (HPLC) as described below.

**DHAD activity:** The DHAD activity was measured in a reaction mixture containing DHAD, 20mM glycerate and 100 mM HEPES buffer (pH 7.4). The reaction mixture was incubated at 50°C for 12 h. The concentration of pyruvate produced from glycerate was determined via HPLC as described below.

**Catalase activity:** The activity of catalase was determined in a reaction mixture containing 20 mM hydrogen peroxide and 100 mM HEPES buffer (pH 7.4) using an Ultrospec™ 2100 pro UV/visible spectrophotometer. The catalase activity was assayed by measuring the change in absorbance at 240nm corresponding to the decomposition of hydrogen peroxide ( $\epsilon_{240} = 43.6 \text{ M}^{-1} \text{ cm}^{-1}$ ).

ALS activity: The ALS activity was measured by monitoring the conversion of pyruvate to  $\alpha$ -acetolactate in a reaction mixture containing 0.2 mM thiamine diphosphate, 10 mM pyruvate and 100 mM HEPES buffer (pH 7.4).<sup>1</sup>

ALDC activity: The ALDC activity was assayed by detecting the production of (3*R*)-acetoin from  $\alpha$ -acetolactate in a reaction mixture containing 5 mM  $\alpha$ -acetolactate and 100 mM HEPES buffer (pH 7.4).<sup>2</sup>  $\alpha$ -Acetolactate was prepared immediately before use from ethyl 2-acetoxy-2-methyl-acetoacetate (Sigma-Aldrich), which could be transformed to  $\alpha$ -acetolactate by adding two equivalents of NaOH.

### **Analytical methods.**

Cell growth was measured via optical density measured at 620nm (OD<sub>620</sub>) using an Ultrospec<sup>TM</sup> 2100 pro UV/visible spectrophotometer. The protein concentration was determined by the Lowry procedure using bovine serum albumin as the standard.<sup>3</sup>

Aqueous concentrations of glycerol, glyceric acid, glyceraldehydes, (3*R*)-acetoin and pyruvic acid were measured by a HPLC system (Agilent 1100 series, Hewlett-Packard), equipped with a refractive index detector.<sup>4</sup> The HPLC was fitted with a Bio-Rad Aminex HPX-87 H column. The mobile phase consisted of 10 mM H<sub>2</sub>SO<sub>4</sub> pumped at 0.4 mL min<sup>-1</sup> (55 °C). The ratio of the (3*R*)-acetoin and (3*S*)-acetoin was analyzed by a gas chromatography (GC) system (Agilent GC6820) using a fused silica capillary column (Supelco Beta DEXTM 120, inside diameter, 0.25 mm; length, 30 m). The operating conditions were as follows: nitrogen was used as the carrier gas; the injector temperature and detector temperature were both 280°C; the column oven

was maintained at 40°C for 3 min and then programmed to increase to 80°C at a rate of 1.5°C min<sup>-1</sup>; the temperature was then raised to 86°C at a rate of 0.5°C min<sup>-1</sup> and finally to 200°C at a rate of 30°C min<sup>-1</sup>; and the injection volume was 1 µL.<sup>5</sup>

**Full-length of *Aldo* with optimized *E. coli* codon usage.**

ATGAGCGACATCACCGTTACCAACTGGGCCGGCAACATCACCTACACCGCG  
AAGGAACTGCTGCGTCCGCACTCCCTGGACGCGCTGCGTGCCCTGGTGGC  
GGACAGCGCCCGTGTGCGTGTGCTGGGCAGCGGTCACTCCTTCAACGAGA  
TCGCCGAGCCGGGCGACGGTGGTGTCTGCTGTCTCTGGCGGGCCTGCCGT  
CCGTGGTGGACGTGGACACCGCGGCCCGTACCGTGCGTGTTGGCGGCGGT  
GTGCGTTACGCGGAGCTGGCCCGTGTGGTGCACGCGCGTGGCCTGGCGCT  
GCCGAACATGGCCTCTCTGCCGCACATCTCTGTTGCCGGTTCTGTGGCCAC  
CGGCACCCACGGTTCTGGTATGGGCAACGGTTCTCTGGCCTCTATGGTGCG  
CGAGGTGGAGCTGGTTACCGCGGACGGTTCTACCGTGGTGATCGCGCGTG  
GCGACGAGCGTTTCGGCGGTGCGGTGACCTCTCTGGGCGCGCTGGGCGTG  
GTGACCTCTCTGACCCTGGACCTGGAGCCGGCGTACGAGATGGAACAGCA  
CGTTTTACCGAGCTGCCGCTGGCCGGTCTGGACCCGGCGACCTTCGAGA  
CCGTGATGGCGGCGGCGTACAGCGTGTCTCTGTTACCGACTGGCGTGCGC  
CGGGTTTCCGTCAGGTGTGGCTGAAGCGTCGCACCGACCGTCCGCTGGAC  
GGTTTCCCGTACGCGGCCCGGCCACCGAGAAGATGCATCCGGTGCCGGG  
CATGCCGGCGGTGAACTGCACCGAGCAGTTCGGTGTGCCGGGTCCGTGGC  
ACGAGCGTCTGCCGCACTTCCGCGCGGAGTTCACCCCGAGCAGCGGTGCC

GAGCTGCAGTCTGAGTACCTGATGCCGCGTGAGCACGCCCTGGCCGCCCT  
GCACGCGATGGACGCGATCCGTGAGACCCTGGCGCCGGTGCTGCAGACCT  
GCGAGATCCGCACCGTTGCCGCCGACGCGCAGTGGCTGAGCCCGGCGTAC  
GGTCGTGACACCGTGGCCGCGCACTTCACCTGGGTTGAGGACACCGCGGC  
GGTGCTGCCGGTGGTGCGTCGTCTGGAGGAGGCGCTGGTTCCGTTCGCGG  
CCCGTCCGCACTGGGGTAAGGTGTTACCGTTCCGGCGGGCGAGCTGCGT  
GCGCTGTACCCGCGTCTGGCCGACTTCGGTGCGCTGGCCCGTGCGCTGGAC  
CCGGCGGGTAAGTTCACCAACGCGTTCGTGCGCGGTGTGCTGGCGGGCTA

A

**Table S1** Strains and plasmids used in this study.

| Strain, plasmid and primer     | Genotype, properties and sequence                                                                                                             | Source or reference |
|--------------------------------|-----------------------------------------------------------------------------------------------------------------------------------------------|---------------------|
| Strain                         |                                                                                                                                               |                     |
| <i>B. licheniformis</i> 10-1-A | Wild type                                                                                                                                     | 6, 7                |
| <i>E. coli</i> DH5 $\alpha$    | <i>supE44 <math>\Delta</math>lacU169 (<math>\phi</math>80 <i>lacZ</i><math>\Delta</math>M15) <i>hsdR17 recA1 endA1 gyrA96 thi-1 relA1</i></i> | Novagen             |
| <i>E. coli</i> BL21 (DE3)      | <i>F' ompT hsdSB (rB<sup>-</sup> mB<sup>-</sup>) gal (<math>\lambda</math> c I 857 <i>ind1 Sam7 nin5 lacUV5 T7gene1</i>) dcm</i> (DE3)        | Novagen             |
| Plasmid                        |                                                                                                                                               |                     |
| pEasy-Blunt                    | Cloning vector; Ap <sup>r</sup>                                                                                                               | Transgene           |
| pETDuet-1                      | Overexpression vector; Ap <sup>r</sup>                                                                                                        | Novagen             |
| pETDuet- <i>Aldo</i>           | pETDuet-1 with <i>Aldo</i> gene of <i>S. coelicolor</i> A3                                                                                    | This study          |
| pETDuet- <i>Dhad</i>           | pETDuet-1 with <i>Dhad</i> gene of <i>S. solfataricus</i>                                                                                     | This study          |
| pETDuet- <i>Als</i>            | pETDuet-1 with <i>Als</i> gene of <i>B. licheniformis</i> 10-1-A                                                                              | This study          |
| pETDuet- <i>Alde</i>           | pETDuet-1 with <i>Alde</i> gene of <i>B. licheniformis</i> 10-1-A                                                                             | This study          |



---

|                          |                                                                     |            |
|--------------------------|---------------------------------------------------------------------|------------|
| pEasy-Blunt- <i>Aldo</i> | pEasy-Blunt with <i>Aldo</i> gene of <i>S. coelicolor</i> A3        | This study |
| pEasy-Blunt- <i>Dhad</i> | pEasy-Blunt with <i>Dhad</i> gene of <i>S. solfataricus</i>         | This study |
| pEasy-Blunt- <i>Als</i>  | pEasy-Blunt with <i>Als</i> gene of <i>B. licheniformis</i> 10-1-A  | This study |
| pEasy-Blunt- <i>Aldc</i> | pEasy-Blunt with <i>Aldc</i> gene of <i>B. licheniformis</i> 10-1-A | This study |

---

**Table S2** Primers used in this study.

| Primer <sup>a</sup> | Oligonucleotide sequence (5' - 3') <sup>b</sup>  | Gene amplified                                |
|---------------------|--------------------------------------------------|-----------------------------------------------|
| Aldo_for            | <u>GGATCC</u> GATGAGCGACATCACCGTTACC (BamHI)     | <i>Aldo</i> in <i>S. coelicolor</i> A3        |
| Aldo_rev            | <u>GTCGACT</u> TAGCCCGCCAGCACACC (SalI)          | <i>Aldo</i> in <i>S. coelicolor</i> A3        |
| Dhad_for            | <u>GGATCC</u> GATGCCAGCAAAATTAAATAGTCCCT (BamHI) | <i>Dhad</i> in <i>S. solfataricus</i>         |
| Dhad_rev            | <u>GTCGACT</u> TAAGCTGGTCTAGTCACAGCCC (SalI)     | <i>Dhad</i> in <i>S. solfataricus</i>         |
| Als_for             | <u>GAGGATCCA</u> ATGAATAATGTAGCCGCTAAAA (BamHI)  | <i>Als</i> in <i>B. licheniformis</i> 10-1-A  |
| Als_rev             | GT <u>CTCGAGT</u> CAAGATTGCTTAGAGGCT (XhoI)      | <i>Als</i> in <i>B. licheniformis</i> 10-1-A  |
| Aldc_for            | <u>GAGGATCCA</u> ATGAAAAGTGCAAGCAAACAAAA (BamHI) | <i>Aldc</i> in <i>B. licheniformis</i> 10-1-A |
| Aldc_rev            | GTAAGCTTTTACTCGGGATTGCCTTCGG (HindIII)           | <i>Aldc</i> in <i>B. licheniformis</i> 10-1-A |

<sup>a</sup> “\_for” in the primer name means that this is the sense primer; “\_rev” in the primer name means that this is the antisense primer.

<sup>b</sup> Restriction sites are underlined, and the restriction enzymes are indicated in parentheses.

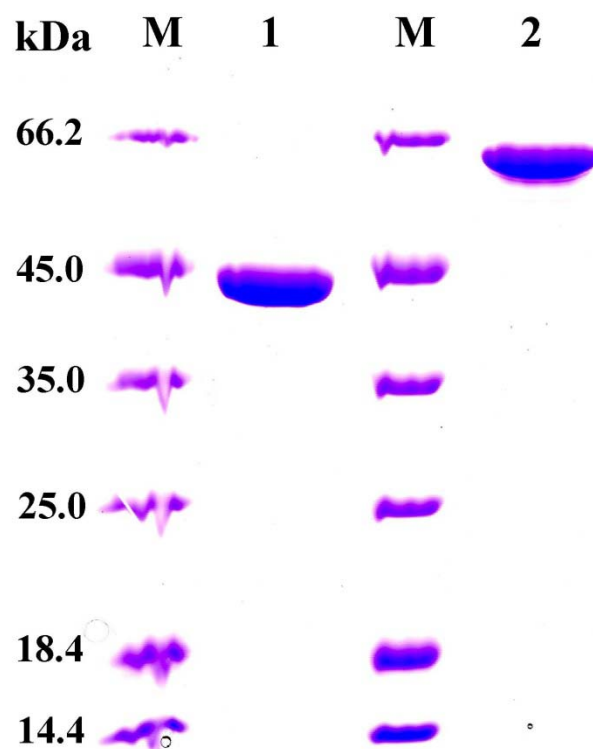

**Figure S1** SDS–PAGE analysis of the purified Aldo and DHAD. M, marker proteins;  
line 1, purified Aldo; line 2, purified DHAD.

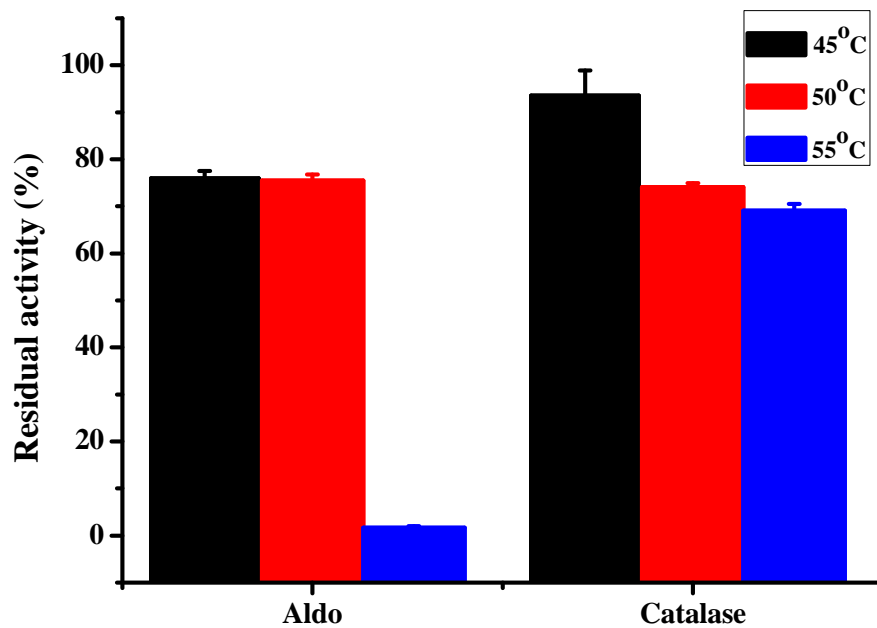

**Figure S2** Thermostability of purified Aldo and catalase shown by residual activities.

Activities of Aldo and catalase were measured after enzyme solutions had been incubated at various temperatures (45–55°C) for 12 h.

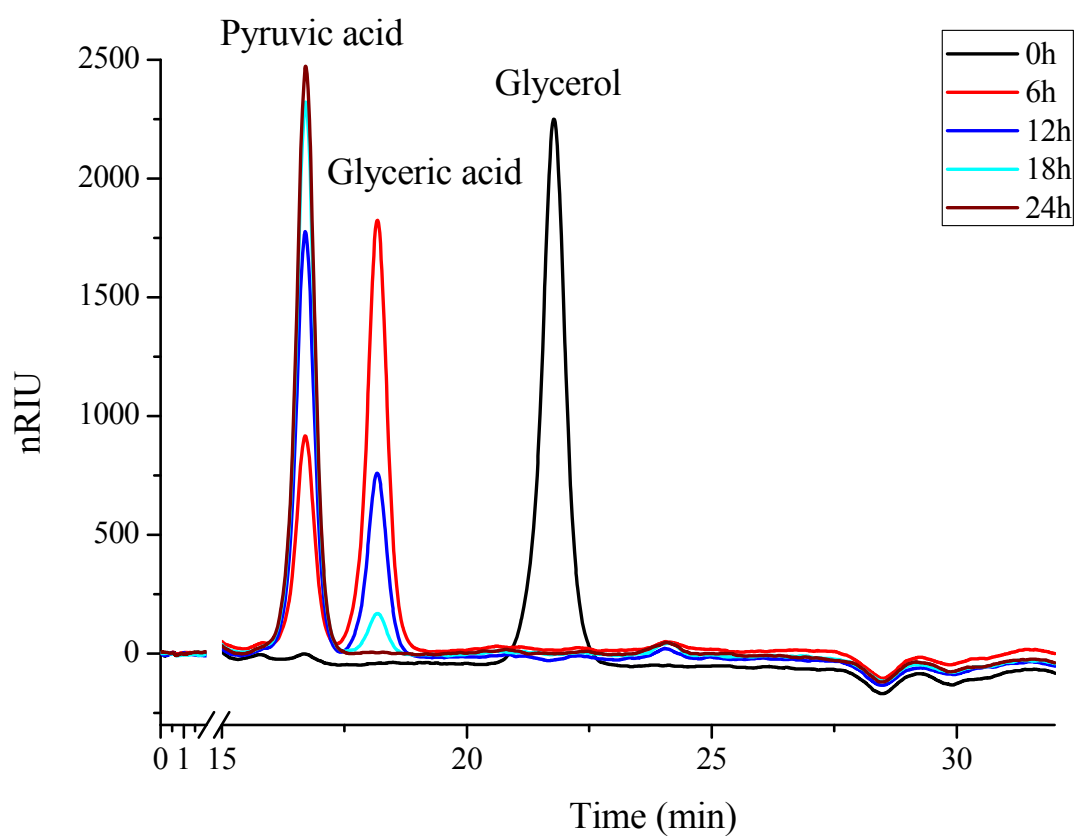

**Figure S3** HPLC analysis of the reaction mixtures containing 100 mM HEPES buffer (pH 7.4), 10 mM glycerol, 0.3 U mL<sup>-1</sup> Aldo, 0.1 U mL<sup>-1</sup> DHAD, and 1000 U mL<sup>-1</sup> catalase at 0 h, 6 h, 12 h, 18 h, and 24 h.



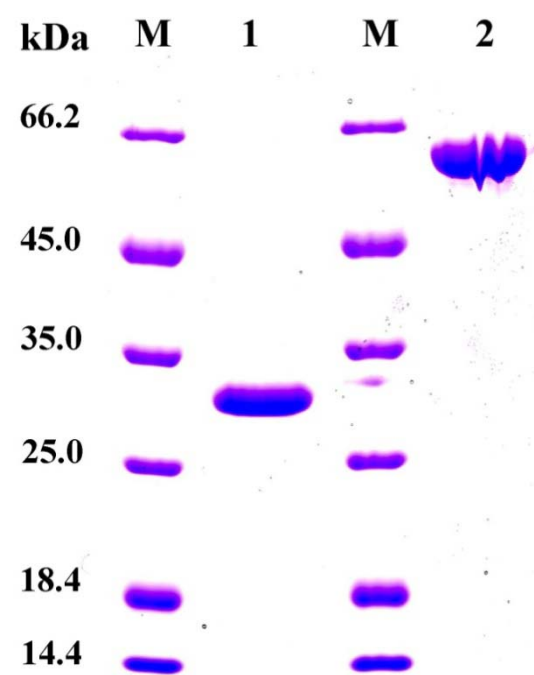

**Figure S5** SDS–PAGE analysis of the purified ALS and ALDC. M, marker proteins; line 1, purified ALDC; line 2, purified ALS.

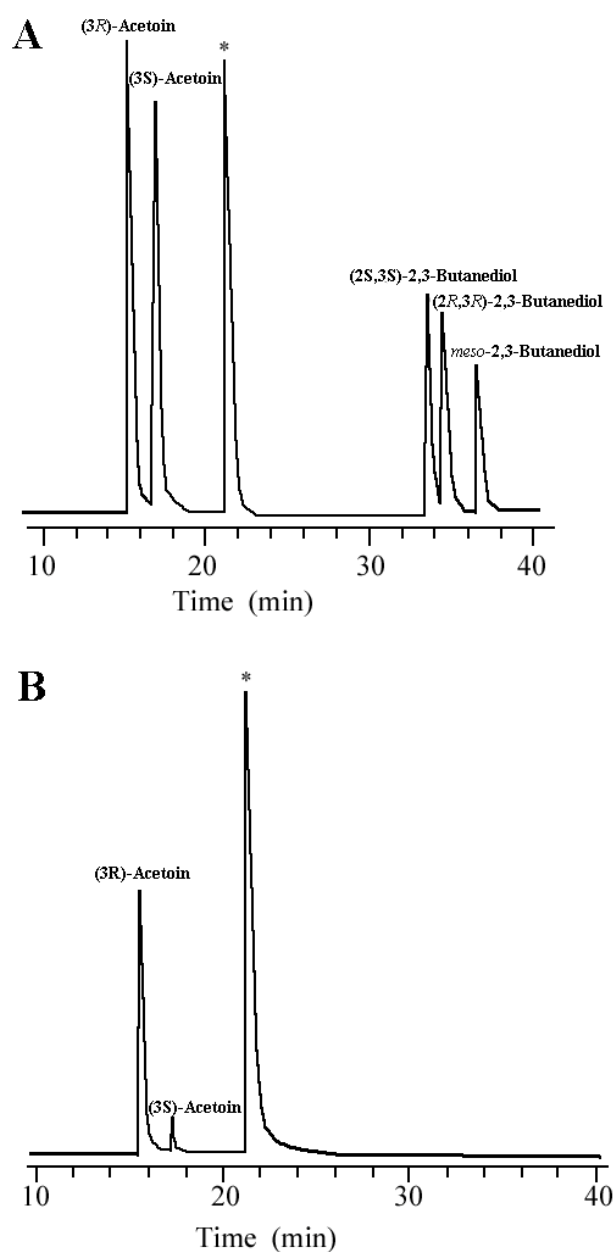

**Figure S6** GC analysis of product of the catalytic reaction (\*Isoamyl alcohol was used as the internal standard). (A) GC analysis of (3S)-acetoin, (3R)-acetoin, *meso*-2,3-butanediol, (2S,3S)-2,3-butanediol and (2R,3R)-2,3-butanediol. (B) Product of the reaction mixture contained 100 mM HEPES buffer (pH 7.4), 10 mM glycerol, 0.2 mM thiamine diphosphate, 0.3 U mL<sup>-1</sup> Aldo, 0.1 U mL<sup>-1</sup> DHAD, and 1000 U mL<sup>-1</sup> catalase, 200 U mL<sup>-1</sup> ALS and 50 U mL<sup>-1</sup> ALDC.



## References

- 1 F. C. Stormer, *Methods. Enzymol.* 1975, **41**, 518.
- 2 V. Phalip, C. Monnet, P. Schmitt, P. Renault, J. J. Godon and C. Diviès, *FEBS. Lett.* 1994, **351**, 95.
- 3 M. A. K. Markwell, S. M. Haas, L. L. Bieber and N. E. Tolbert, *Anal. Biochem.* 1978, **87**, 206.
- 4 C. Gao, W. Zhang, C. J. Lv, L. X. Li, C. Q. Ma, C. H. Hu and P. Xu, *Appl. Environ. Microbiol.* 2010, **76**, 1679.
- 5 C. Gao, L. Zhang, Y. Xie, C. Hu, Y. Zhang, L. Li, Y. Wang, C. Ma and P. Xu, *Bioresour. Technol.* 2013, **137**, 111.
- 6 L. Li, L. Zhang, K. Li, Y. Wang, C. Gao, B. Han, C. Ma, and P. Xu, *Biotechnol. Biofuels.* 2013, **6**, 123.
- 7 L. Li, F. Su, Y. Wang, L. Zhang, C. Liu, J. Li, C. Ma and P. Xu, *J. Bacteriol.* 2012, **194**, 4133.
- 8 X. J. Ji, H. Huang and P. K. Ouyang, *Biotechnol. Adv.* 2011, **29**, 351.
- 9 Y. Wang, F. Tao and P. Xu, *J. Biol. Chem.* 2014, **289**, 6080.
